# Supplementary material for: A New Benzothiadiazole Derivative with Systemic Acquired Resistance Activity in the Protection of Zucchini (Cucurbita pepo convar. giromontiina) against Viral and Fungal Pathogens
Source: MDPI journal article supplement (doi:10.3390/plants12010043), 2022-12-22
Supplement: s1 [file s1]

## *Supplementary Materials*

# **A new benzothiadiazole derivative with systemic acquired resistance activity in the protection of Zucchini (*Cucurbita pepo* convar. *giromontiina*) against viral and fungal pathogens**

Maciej Spychalski <sup>1</sup>, Rafal Kukawka <sup>1,2</sup>, Raghavendra Prasad <sup>3</sup>, Natasza Borodynko-Filas <sup>4</sup>, Sylwia Stępniewska-Jarosz <sup>4</sup>, Krzysztof Turczański <sup>5</sup> and Marcin Smiglak <sup>1,2\*</sup>

<sup>1</sup> Poznan Science and Technology Park, Rubież 46, 61-612 Poznań, Poland;  
maciej.spychalski@ppnt.poznan.pl (M.Sp.); kukawka.rafal@gmail.com (R.K.);  
marcin.smiglak@ppnt.poznan.pl (M.S.)

<sup>2</sup> Innosil Sp. z o.o., Rubież 46, 61-612 Poznań, Poland; biuro.innosil@gmail.com

<sup>3</sup> Environmental Horticulture, Royal Horticultural Society (RHS), Wisley, Surrey, United Kingdom

<sup>4</sup> Plant Disease Clinic and Bank of Pathogens, Institute of Plant Protection-National Research Institute,  
ul. Węgorka 20, 60-318 Poznań, Poland, n.borodynko@iorpib.poznan.pl (N.B-F.),  
s.jarosz@iorpib.poznan.pl (S.S-J.)

<sup>5</sup> Department of Entomology and Forest Phytopathology, Faculty of Forestry and Wood Technology,  
Poznań University of Life Sciences, Wojska Polskiego 71c, 60-625 Poznań, Poland;  
krzysztof.turczanski@up.poznan.pl

## Table of content

|                                                                                                                                                   |   |
|---------------------------------------------------------------------------------------------------------------------------------------------------|---|
| Table S1 Schedule of treatments for the experiment in 2019 .....                                                                                  | 3 |
| Table S2 Schedule of treatments for the experiment in 2020 .....                                                                                  | 4 |
| Table S3 Characteristics of atmospheric conditions during the experiment in 2019. ....                                                            | 5 |
| Table S4 Characteristics of atmospheric conditions during the experiment in 2020. ....                                                            | 5 |
| Table S5 Table with mean values obtained for powdery mildew assessment and DSI calculation and<br>for DSI values calculated viral pathogens ..... | 6 |

Table S1 Schedule of treatments for the experiment in 2019

| Variants of treatment                | Date of treatments |                   |                |                   |               |                   |              |                |
|--------------------------------------|--------------------|-------------------|----------------|-------------------|---------------|-------------------|--------------|----------------|
|                                      | 10.06.2019         | 17.06.2019        | 21.06.2019     | 24.06.2019        | 1.07.2019     | 8.07.2019         | 10.07.2019   | 15.07.2019     |
| Untreated Control (UTC)              |                    | EMULPAR<br>940 EC |                | SWITCH<br>62,5 WG |               | SWITCH<br>62,5 WG | SILTAC<br>EC | BTHWA<br>10 SC |
| 4 treatments with BTHWA<br>(4xBTHWA) | BTHWA<br>10 SC     | EMULPAR<br>940 EC | BTHWA<br>10 SC | SWITCH<br>62,5 WG | BTHWA<br>10SC | SWITCH<br>62,5 WG | SILTAC<br>EC | BTHWA<br>10 SC |
| 8 treatments with BTHWA<br>(8xBTHWA) | BTHWA<br>10 SC     | EMULPAR<br>940 EC | BTHWA<br>10 SC | SWITCH<br>62,5 WG | BTHWA<br>10SC | SWITCH<br>62,5 WG | SILTAC<br>EC | BTHWA<br>10 SC |

| Variants of treatment                | Date of treatments |                |                   |               |              |               |               |
|--------------------------------------|--------------------|----------------|-------------------|---------------|--------------|---------------|---------------|
|                                      | 20.07.2019         | 29.07.2019     | 5.08.2019         | 10.08.2019    | 15.08.2019   | 24.08.2019    | 06.09.2019    |
| Untreated Control (UTC)              | EMULPAR<br>940 EC  |                | BIOSEPT<br>ACTIVE |               | SILTAC<br>EC |               |               |
| 4 treatments with BTHWA<br>(4xBTHWA) | EMULPAR<br>940 EC  |                | BIOSEPT<br>ACTIVE |               | SILTAC<br>EC |               |               |
| 8 treatments with BTHWA<br>(8xBTHWA) | EMULPAR<br>940 EC  | BTHWA<br>10 SC | BIOSEPT<br>ACTIVE | BTHWA<br>10SC | SILTAC<br>EC | BTHWA<br>10SC | BTHWA<br>10SC |

**FUNGICIDES:** Switch 62,5 WG (cyprodinil 37,5%, fludioxonil 25%; Syngenta Polska, 1kg/ha, 600L/ha) against *Botrytis cinerea*; Biosept Active (extract from grapefruit 25L/ha, 600L/ha) against *Botrytis cinerea*; **INSECTICIDES:** EMULPAR 940 EC (Target, 6l/ha, 500L/ha) against aphids, SILTAC EC (ICB-Pharma, 500ml/ha, 400 l/ha) against aphids; **SYSTEMIC ACQUIRED RESISTANCE INDUCERS:** BTHWA 10SC (*N*-methoxy-*N*-methylbenzo(1.2.3)thiadiazole-7-carboxamide 1%, Innosil Sp. z o.o., 1l/ha, 400l/ha)

Table S2 Schedule of treatments for the experiment in 2020

| Variants of treatment                | Date of treatments |                   |                |                   |               |                   |              |                |
|--------------------------------------|--------------------|-------------------|----------------|-------------------|---------------|-------------------|--------------|----------------|
|                                      | 8.06.2020          | 17.06.2020        | 20.06.2020     | 27.06.2020        | 1.07.2020     | 7.07.2020         | 14.07.2020   | 17.07.2020     |
| Untreated Control (UTC)              |                    | EMULPAR<br>940 EC |                | SWITCH<br>62,5 WG |               | SWITCH<br>62,5 WG | SILTAC<br>EC | BTHWA<br>10 SC |
| 4 treatments with BTHWA<br>(4xBTHWA) | BTHWA<br>10 SC     | EMULPAR<br>940 EC | BTHWA<br>10 SC | SWITCH<br>62,5 WG | BTHWA<br>10SC | SWITCH<br>62,5 WG | SILTAC<br>EC | BTHWA<br>10 SC |
| 8 treatments with BTHWA<br>(8xBTHWA) | BTHWA<br>10 SC     | EMULPAR<br>940 EC | BTHWA<br>10 SC | SWITCH<br>62,5 WG | BTHWA<br>10SC | SWITCH<br>62,5 WG | SILTAC<br>EC | BTHWA<br>10 SC |

| Variants of treatment                | Date of treatments |                |                   |               |              |               |               |
|--------------------------------------|--------------------|----------------|-------------------|---------------|--------------|---------------|---------------|
|                                      | 22.07.2020         | 31.07.2020     | 6.08.2020         | 9.08.2020     | 15.08.2020   | 25.08.2020    | 7.09.2020     |
| Untreated Control (UTC)              | EMULPAR<br>940 EC  |                | BIOSEPT<br>ACTIVE |               | SILTAC<br>EC |               |               |
| 4 treatments with BTHWA<br>(4xBTHWA) | EMULPAR<br>940 EC  |                | BIOSEPT<br>ACTIVE |               | SILTAC<br>EC |               |               |
| 8 treatments with BTHWA<br>(8xBTHWA) | EMULPAR<br>940 EC  | BTHWA<br>10 SC | BIOSEPT<br>ACTIVE | BTHWA<br>10SC | SILTAC<br>EC | BTHWA<br>10SC | BTHWA<br>10SC |

**FUNGICIDES:** Switch 62,5 WG (cyprodinil 37,5%, fludioxonil 25%; Syngenta Polska, 1kg/ha, 600L/ha) against *Botrytis cinerea*; Biosept Active (extract from grapefruit 25L/ha, 600L/ha) against *Botrytis cinerea*; **INSECTICIDES:** EMULPAR 940 EC (Target, 6l/ha, 500L/ha) against aphids, SILTAC EC (ICB-Pharma, 500ml/ha, 400 l/ha) against aphids; **SYSTEMIC ACQUIRED RESISTANCE INDUCERS:** BTHWA 10SC (*N*-methoxy-*N*-methylbenzo(1.2.3)thiadiazole-7-carboxamide 1%, Innosil Sp. z o.o., 1l/ha, 400l/ha)

Table S3 Characteristics of atmospheric conditions during the experiment in 2019.

| Month/Year     | Terce | Mean Temperature [°C] | Sum of Rainfall [mm] | Wind [m/s] |
|----------------|-------|-----------------------|----------------------|------------|
| March 2019     | 1     | 5.86                  | 10.60                | 5.16       |
| March 2019     | 2     | 5.15                  | 18.30                | 4.75       |
| March 2019     | 3     | 7.45                  | 6.90                 | 3.15       |
| April 2019     | 1     | 8.36                  | 0.00                 | 4.45       |
| April 2019     | 2     | 7.61                  | 0.10                 | 3.12       |
| April 2019     | 3     | 14.01                 | 7.50                 | 4.21       |
| May 2019       | 1     | 9.41                  | 4.00                 | 3.08       |
| May 2019       | 2     | 12.56                 | 38.70                | 2.77       |
| May 2019       | 3     | 15.41                 | 38.20                | 2.3        |
| June 2019      | 1     | 22.14                 | 1.10                 | 2.4        |
| June 2019      | 2     | 22.98                 | 0.80                 | 2.56       |
| June 2019      | 3     | 21.3                  | 29.50                | 2.11       |
| July 2019      | 1     | 16.63                 | 0.60                 | 3.05       |
| July 2019      | 2     | 18.2                  | 6.20                 | 1.77       |
| July 2019      | 3     | 21.8                  | 0.00                 | 2.4        |
| August 2019    | 1     | 19.59                 | 18.10                | 2.13       |
| August 2019    | 2     | 19.87                 | 8.10                 | 2.11       |
| August 2019    | 3     | 22.22                 | 0.00                 | 1.95       |
| September 2019 | 1     | 16.78                 | 26.40                | 2.52       |
| September 2019 | 2     | 12.92                 | 5.40                 | 3.28       |
| September 2019 | 3     | 12.63                 | 37.50                | 2.7        |

Table S4 Characteristics of atmospheric conditions during the experiment in 2020.

| Month/Year     | Terce | Mean Temperature [°C] | Sum of Rainfall [mm] | Wind [m/s] |
|----------------|-------|-----------------------|----------------------|------------|
| March 2020     | 1     | 4.17                  | 15.00                | 2.79       |
| March 2020     | 2     | 6.27                  | 11.40                | 3.96       |
| March 2020     | 3     | 2.98                  | 0.00                 | 3.66       |
| April 2020     | 1     | 7.88                  | 0.00                 | 3.37       |
| April 2020     | 2     | 7.38                  | 2.20                 | 3.49       |
| April 2020     | 3     | 11.24                 | 0.20                 | 2.85       |
| May 2020       | 1     | 11.88                 | 8.00                 | 2.92       |
| May 2020       | 2     | 10.61                 | 0.10                 | 2.97       |
| May 2020       | 3     | 12.37                 | 0.00                 | 2.97       |
| June 2020      | 1     | 15.20                 | 0.00                 | 2.75       |
| June 2020      | 2     | 20.23                 | 2.20                 | 2.14       |
| June 2020      | 3     | 15.24                 | 58.40                | 2.23       |
| July 2020      | 1     | 17.02                 | 15.80                | 2.39       |
| July 2020      | 2     | 18.45                 | 33.30                | 1.96       |
| July 2020      | 3     | 19.51                 | 1.30                 | 1.85       |
| August 2020    | 1     | 20.94                 | 0.90                 | 1.57       |
| August 2020    | 2     | 21.01                 | 1.30                 | 1.62       |
| August 2020    | 3     | 16.93                 | 26.40                | 2.72       |
| September 2020 | 1     | 14.61                 | 31.40                | 2.19       |
| September 2020 | 2     | 15.67                 | 0.00                 | 1.95       |
| September 2020 | 3     | 15.06                 | 47.40                | 2.54       |

Table S5 Table with mean values obtained for powdery mildew assessment and DSI calculation and for DSI values calculated viral pathogens

| Year | Variant of Treatment | Number of block | DSI Index for WMV | DSI Index for CABYV | DSI Index for ZYMV | Powdery mildew assessment | DSI index for Powdery Mildew |
|------|----------------------|-----------------|-------------------|---------------------|--------------------|---------------------------|------------------------------|
| 2019 | UTC                  | 1               | 0.45              | 0.65                | none               | 4.2                       | 0.84                         |
| 2019 | UTC                  | 2               | 0.4               | 0.75                | none               | 4.75                      | 0.95                         |
| 2019 | UTC                  | 3               | 0.45              | 0.7                 | none               | 4.65                      | 0.93                         |
| 2019 | UTC                  | 4               | 0.4               | 0.7                 | none               | 4.6                       | 0.92                         |
| 2020 | UTC                  | 1               | 0.35              | none                | 0.4                | 4.55                      | 0.91                         |
| 2020 | UTC                  | 2               | 0.3               | none                | 0.45               | 4.75                      | 0.95                         |
| 2020 | UTC                  | 3               | 0.35              | none                | 0.35               | 4.9                       | 0.98                         |
| 2020 | UTC                  | 4               | 0.25              | none                | 0.4                | 4.8                       | 0.96                         |
| 2019 | 8xBTHWA              | 1               | 0.3               | 0.6                 | none               | 3.75                      | 0.75                         |
| 2019 | 8xBTHWA              | 2               | 0.25              | 0.6                 | none               | 3.9                       | 0.78                         |
| 2019 | 8xBTHWA              | 3               | 0.2               | 0.5                 | none               | 3.9                       | 0.78                         |
| 2019 | 8xBTHWA              | 4               | 0.3               | 0.4                 | none               | 3.85                      | 0.77                         |
| 2020 | 8xBTHWA              | 1               | 0.15              | none                | 0.2                | 3.35                      | 0.67                         |
| 2020 | 8xBTHWA              | 2               | 0.25              | none                | 0.15               | 3.5                       | 0.7                          |
| 2020 | 8xBTHWA              | 3               | 0.1               | none                | 0.15               | 3.5                       | 0.7                          |
| 2020 | 8xBTHWA              | 4               | 0.2               | none                | 0.3                | 3.6                       | 0.72                         |
| 2019 | 4xBTHWA              | 1               | 0.15              | 0.45                | none               | 3.45                      | 0.69                         |
| 2019 | 4xBTHWA              | 2               | 0.2               | 0.4                 | none               | 3.5                       | 0.7                          |
| 2019 | 4xBTHWA              | 3               | 0.25              | 0.4                 | none               | 3.35                      | 0.67                         |
| 2019 | 4xBTHWA              | 4               | 0.25              | 0.4                 | none               | 3.4                       | 0.68                         |
| 2020 | 4xBTHWA              | 1               | 0.1               | none                | 0.15               | 2.95                      | 0.59                         |
| 2020 | 4xBTHWA              | 2               | 0.1               | none                | 0.2                | 3.2                       | 0.64                         |
| 2020 | 4xBTHWA              | 3               | 0.2               | none                | 0.15               | 3.15                      | 0.63                         |
| 2020 | 4xBTHWA              | 4               | 0.15              | none                | 0.15               | 2.95                      | 0.59                         |

Values were calculated as a mean value for each block consisting of 20 replicated each, for each tested variant of treatment
